# Supplementary material for: Readiness Factors for Sustainable Lean Transformation of Construction Organizations
Source: MDPI journal article supplement (doi:10.3390/su15086433), 2023-04-10
Supplement: s1 [file s1]

Archive with 1 entries (1 files):
- sustainability-2307961-supplementary.pdf
